# Supplementary material for: Systemic Inflammatory Score predicts Overall Survival in patients with Cervical Cancer
Source: PubMed Central journal article supplement (PMC8120179; doi:10.7150/jca.56170), 2021-04-30
Supplement: jcav12p3671s1.pdf [file jcav12p3671s1.pdf]

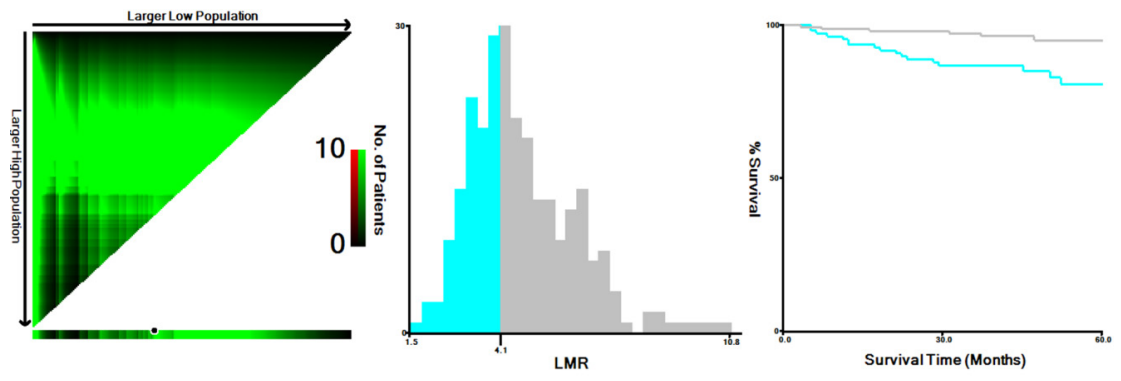

**Supplemental Fig. 1** The cut-off value of LMR according to X-tile. LMR indicates lymphocyte-to-monocyte ratio.
